# Supplementary material
Source: Springer Nature journal article supplement (https://www.springermedizin.de/resource/supplementary/12883_2014_1052_MOESM7_ESM.pdf/9456438)

A

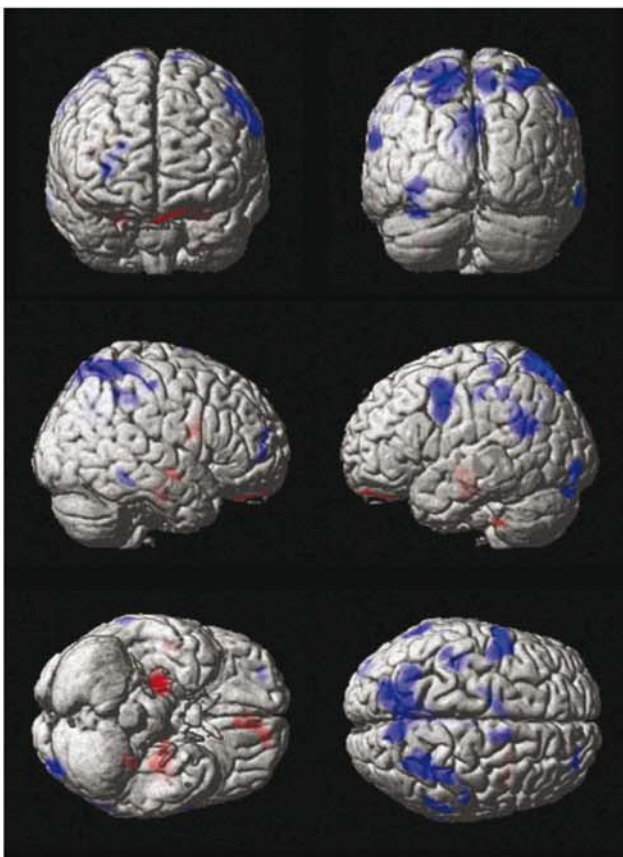

Anti-NMDA vs. controls

B

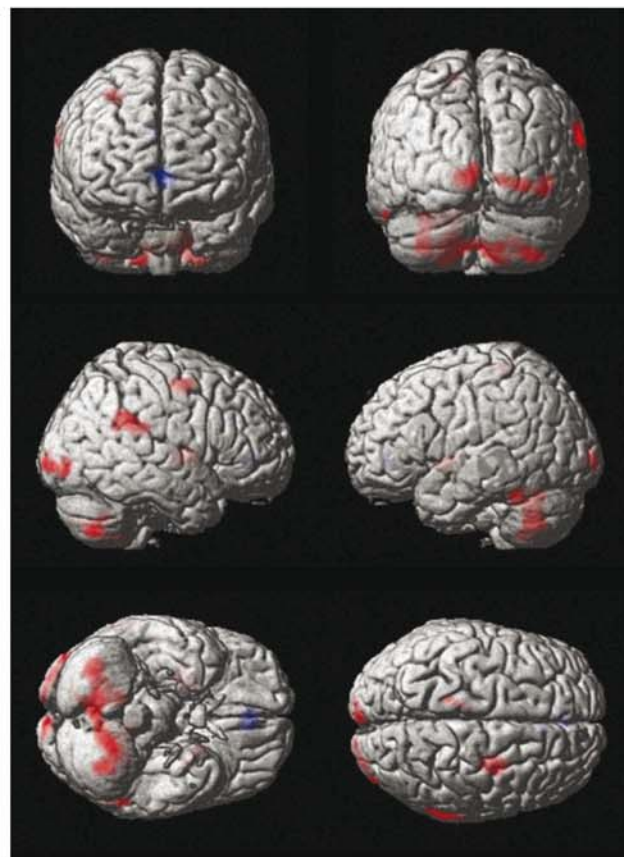

Anti-LGI1 vs. controls

C

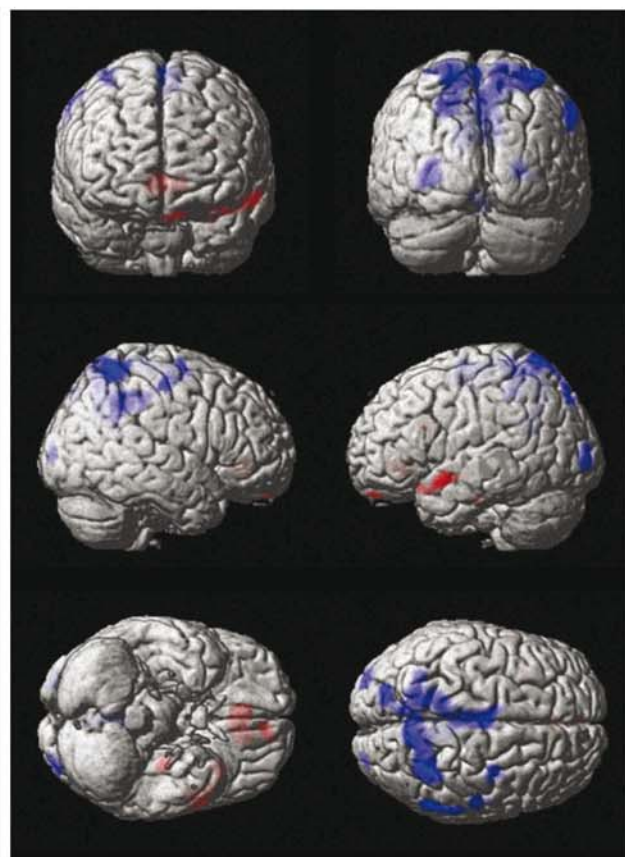

Anti-NMDA vs. Anti-LGI1

Supplement: MOESM7 [file 9456438]
